# Supplementary material for: Preferential Expression of B7‐H6 in Glioma Stem‐Like Cells Enhances Tumor Cell Proliferation via the c‐Myc/RNMT Axis
Source: Hindawi journal article supplement (doi:10.1155/2020/2328675), 2020-01-01
Supplement: f1 [file 2328675.f1.pdf]

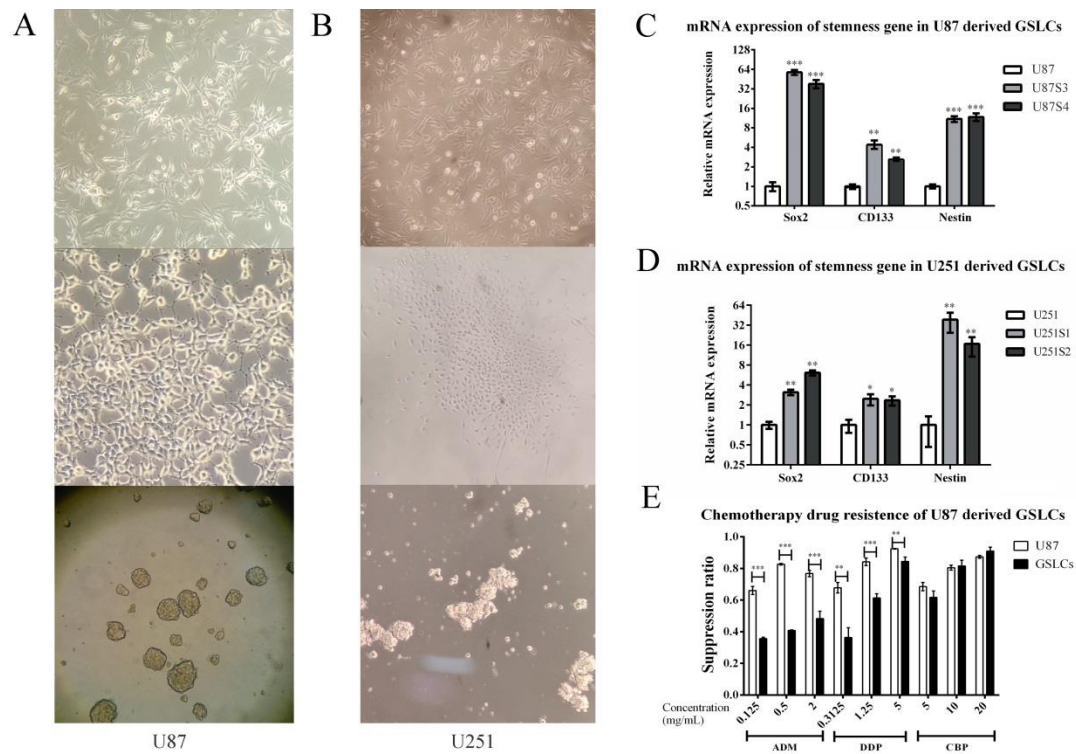

Figure S1. Cellular morphology and identification of U87 and U251 derived GSLCs. (A and B) U87 or U251 cultured with complete medium (200 $\times$ ) (above). U87 or U251 cells shaped as atypical form 15 days after clones formation (200 $\times$ ) (middle). Most cells from (middle) formed spheres 72 h after culturing with stem cell medium (200 $\times$ )(bottom). (C and D) Sox2, CD133 and Nestin were detected in two clones of GSLCs derived from U87 or U251 cells each by real-time PCR. Data were shown as mean $\pm$ S.D. (E) U87 and GSLCs were seeded in 96 wells and treated with three types of chemotherapy drugs at three different concentrations for 48 h. A450 was measured by CCK-8 reagent. Suppression Ratio was calculated as  $(A450_{NC}-A450)/A450_{NC}$ . Data were mean $\pm$ S.D. \* $P$ <0.05, \*\* $P$ <0.01, \*\*\* $P$ <0.005.

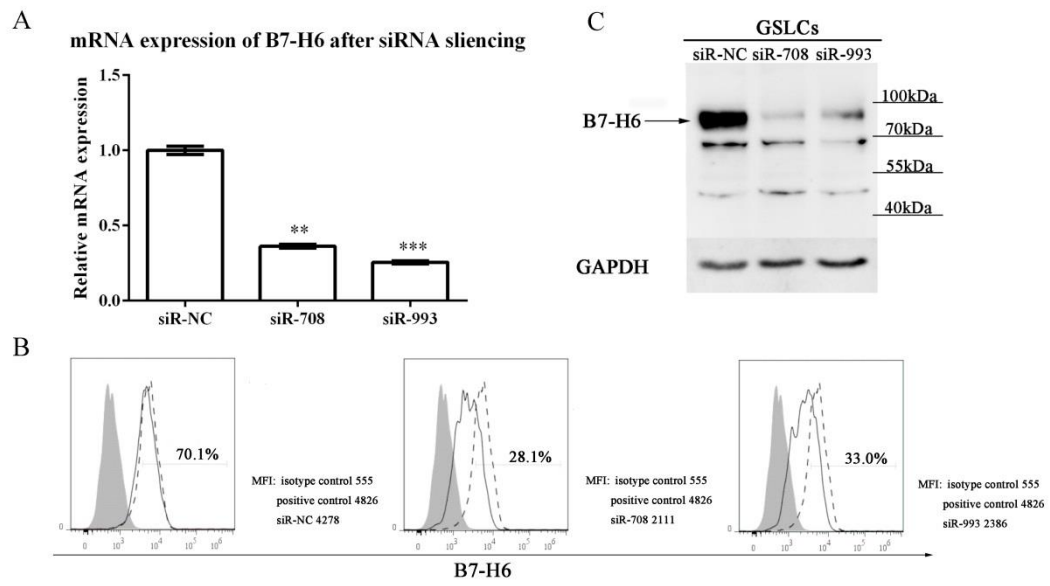

Figure S2. B7-H6 silencing by specific siRNA. (A) B7-H6 mRNA was detected by real-time PCR 72 h after transfection. (B) B7-H6 protein was detected by flow cytometry 96 h after transfection. Filled histograms represent to isotype controls while open histograms represent to staining groups. (C) B7-H6 protein was detected by western blot 96 h after transfection. Data of (A) were  $\text{mean} \pm \text{S.D.}$ . \*\* $P < 0.01$ , \*\*\* $P < 0.005$ .

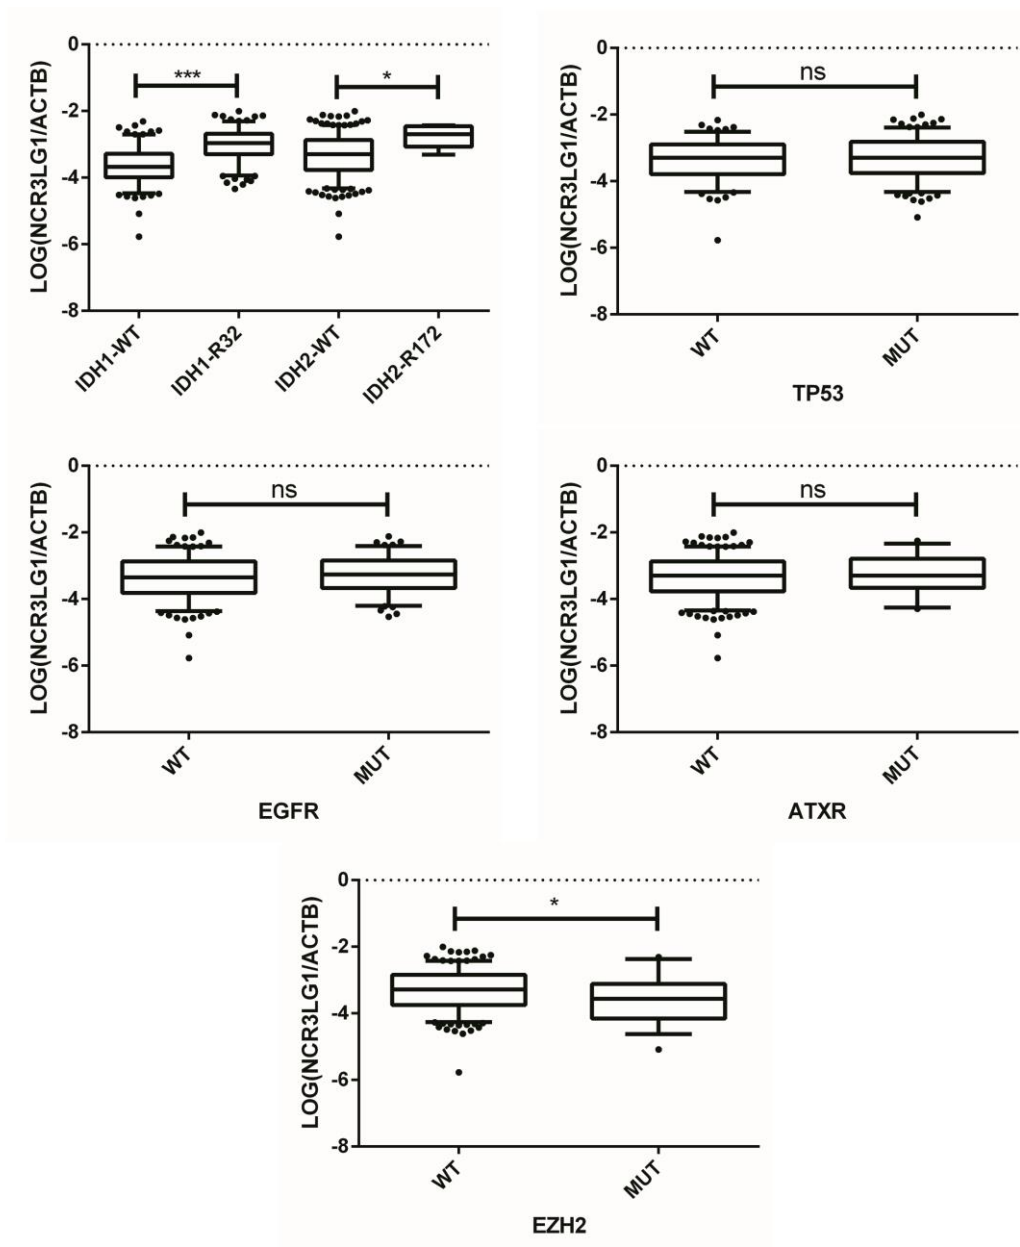

Figure S3. The corelationship between B7-H6 expression and gene mutations. T test was performed to compare the difference of B7-H6 relative expression between the samples with or without specific gene mutation based on CGGA mRNA-seq database (n=325). Data were shown as 5-95 percentile. \*P<0.05, \*\*P<0.01, \*\*\*P<0.005.

| Sample ID | Gender | Age | Histologic Classification       | WHO Grade | Comment                        |
|-----------|--------|-----|---------------------------------|-----------|--------------------------------|
| GLI-002   | Male   | 26  | Astrocytoma                     | II        |                                |
| GLI-003   | Male   | 37  | oligoastrocytoma                | II        |                                |
| GLI-004   | Male   | 53  | Astrocytoma                     | III       |                                |
| GLI-005   | Female | 51  | Astrocytoma                     | III       |                                |
| GLI-006   | Female | 25  | anaplastic ependymoma           | III       |                                |
| GLI-007   | Female | 72  | Astrocytoma                     | I         |                                |
| GLI-008   | Male   | 37  | anaplastic astrocytoma          | III       |                                |
| GLI-009   | Male   | 62  | Astrocytoma                     | II-III    |                                |
| GLI-010   | Male   | 29  | Astrocytoma                     | III       |                                |
| GLI-011   | Male   | 46  | Astrocytoma                     | I - II    |                                |
| GLI-012   | Female | 71  | Glioblatoma                     | IV        |                                |
| GLI-014   | Male   | 21  | Mixed glioma, oligodendroglioma | II        |                                |
| GLI-015   | Male   | 22  | Oligodendroglioma               | II        |                                |
| GLI-016   | Female | 45  | Astrocytoma                     | II        |                                |
| GLI-017   | Male   | 12  | Astrocytoma                     | III       |                                |
| GLI-018   | Male   | 46  | Astrocytoma                     | I - II    |                                |
| GLI-020   | Male   | 48  | Astrocytoma                     | I         |                                |
| GLI-021   | Male   | 32  | Anaplastic oligoastrocytoma     | III       |                                |
| GLI-022   | Male   | 12  | Pilocytic astrocytoma           | I         |                                |
| GLI-023   | Male   | 66  | Astrocytoma                     | II-III    |                                |
| GLI-024   | Male   | 69  | Astrocytoma                     | II        |                                |
| GLI-025   | Male   | 46  | Astrocytoma                     | II        |                                |
| GLI-026   | Male   | 33  | Astrocytoma                     | II        |                                |
| GLI-027   | Male   | 53  | Astrocytoma                     | III-IV    |                                |
| GLI-028   | Female | 49  | Oligodendroglioma               | II-III    | weak staining in Fig.1A        |
| GLI-029   | Female | 61  | Glioblatoma                     | IV        |                                |
| GLI-030   | Female | 41  | Astrocytoma                     | III       |                                |
| GLI-031   | Male   | 43  | Astrocytoma                     | II        |                                |
| GLI-032   | Male   | 55  | Astrocytoma                     | III       |                                |
| GLI-033   | Male   | 63  | Glioblatoma                     | IV        |                                |
| GLI-034   | Female | 36  | Astrocytoma                     | III       | strong staining in Fig.1A      |
| GLI-036   | Male   | 45  | Astrocytoma                     | III       | moderate staining in<br>Fig.1A |
| GLI-037   | Male   | 56  | Astrocytoma                     | III       |                                |
| GLI-038   | Female | 50  | Astrocytoma                     | III       |                                |
| GLI-039   | Male   | 53  | Glioblatoma                     | IV        |                                |
| GLI-040   | Male   | 64  | Astrocytoma                     | III       |                                |
| GLI-041   | Male   | 51  | Astrocytoma                     | III       |                                |

Table S1. Information of tissue samples used in this study.
